# Supplementary material for: A Multi-Pathogen Screening of Captive Reindeer (Rangifer tarandus) in Germany Based on Serological and Molecular Assays
Source: PubMed Central journal article supplement (PMC6933772; doi:10.3389/fvets.2019.00461), 2019-12-20

**APPENDIX 1** | Individual plots of the multivariate analyses for presence of antibodies against alphaherpesvirus, bluetongue virus, MCF-related gammaherpesvirus, pestivirus, Schmallenberg virus, *Brucella* spp., *Neospora caninum* and *Toxoplasma gondii*, and the presence of *Anaplasma phagocytophilum* DNA in the analyzed reindeer. Black dots represent negative cases, gray dots represent positive cases and blue triangles represent the explanatory variables.

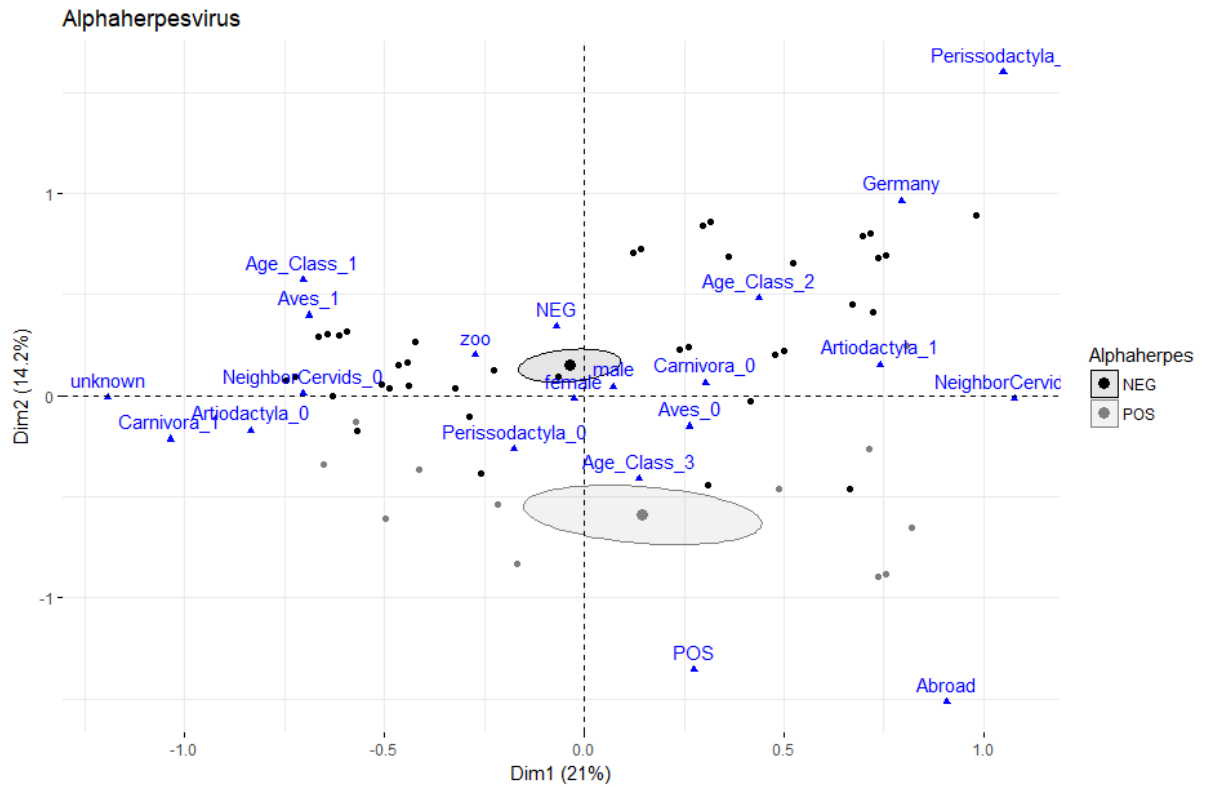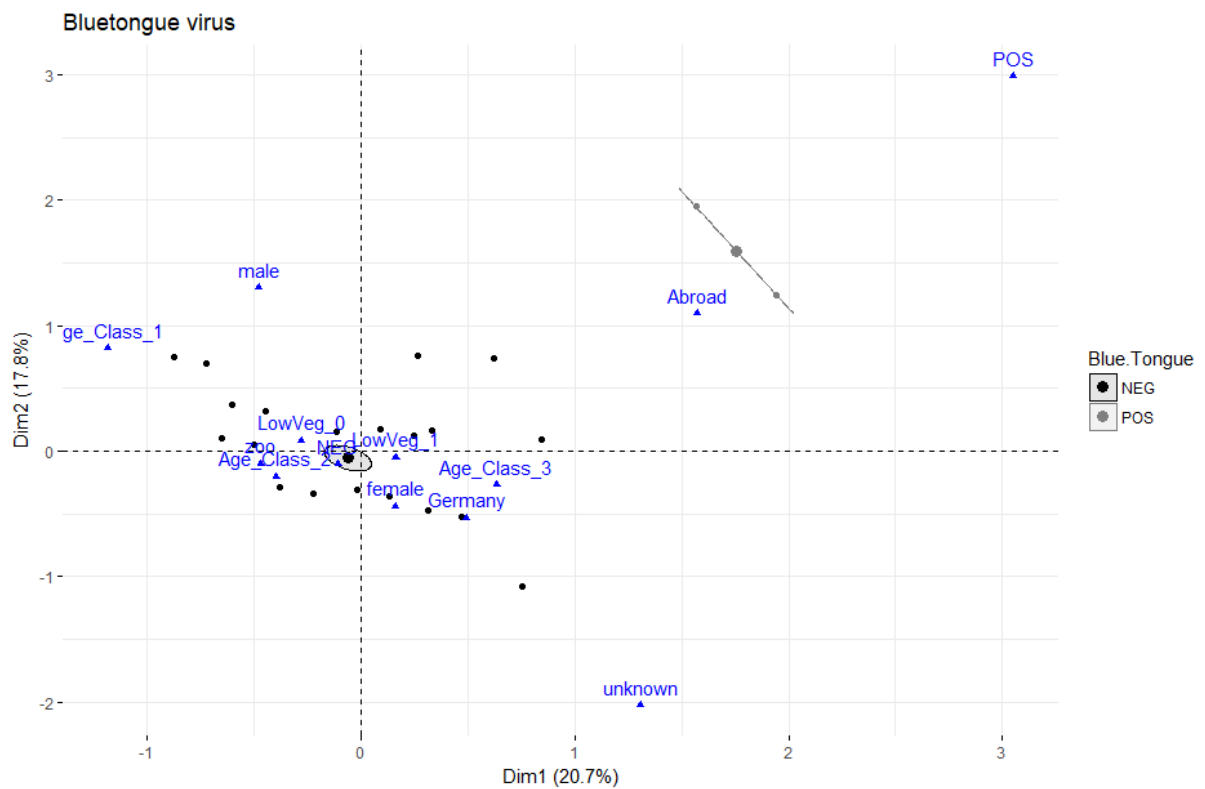

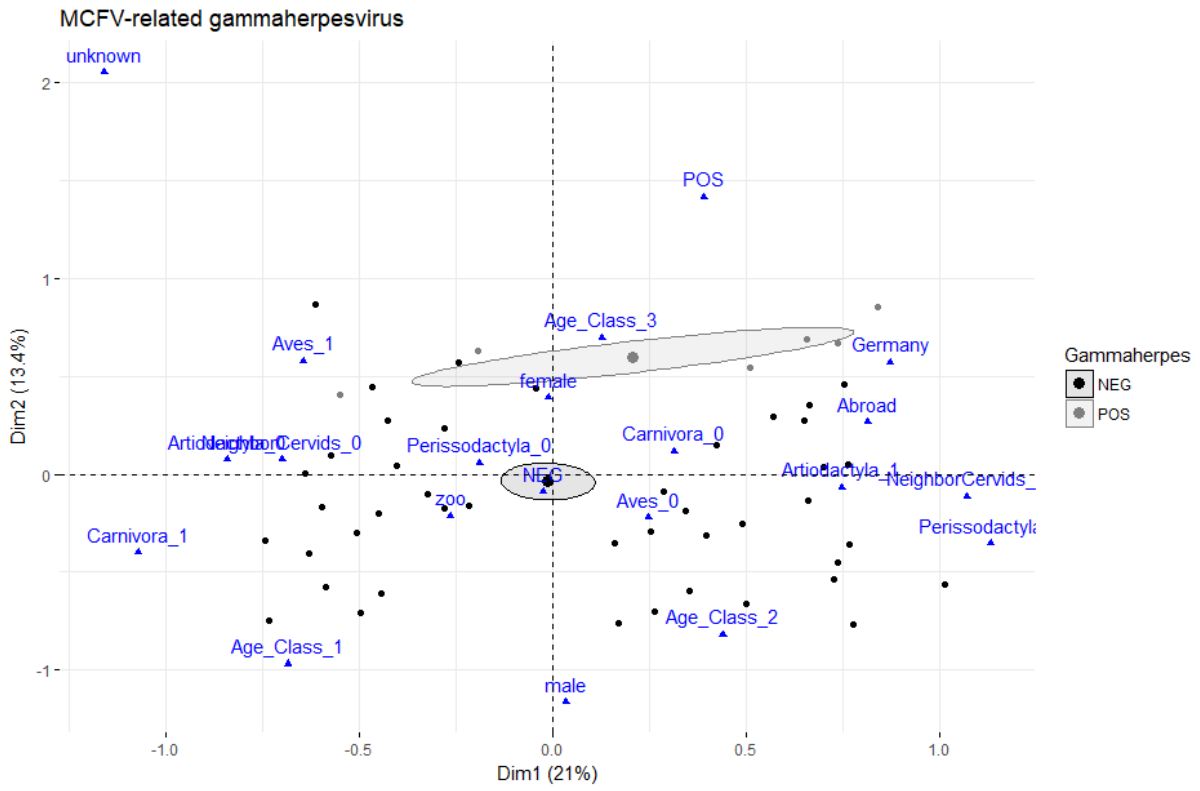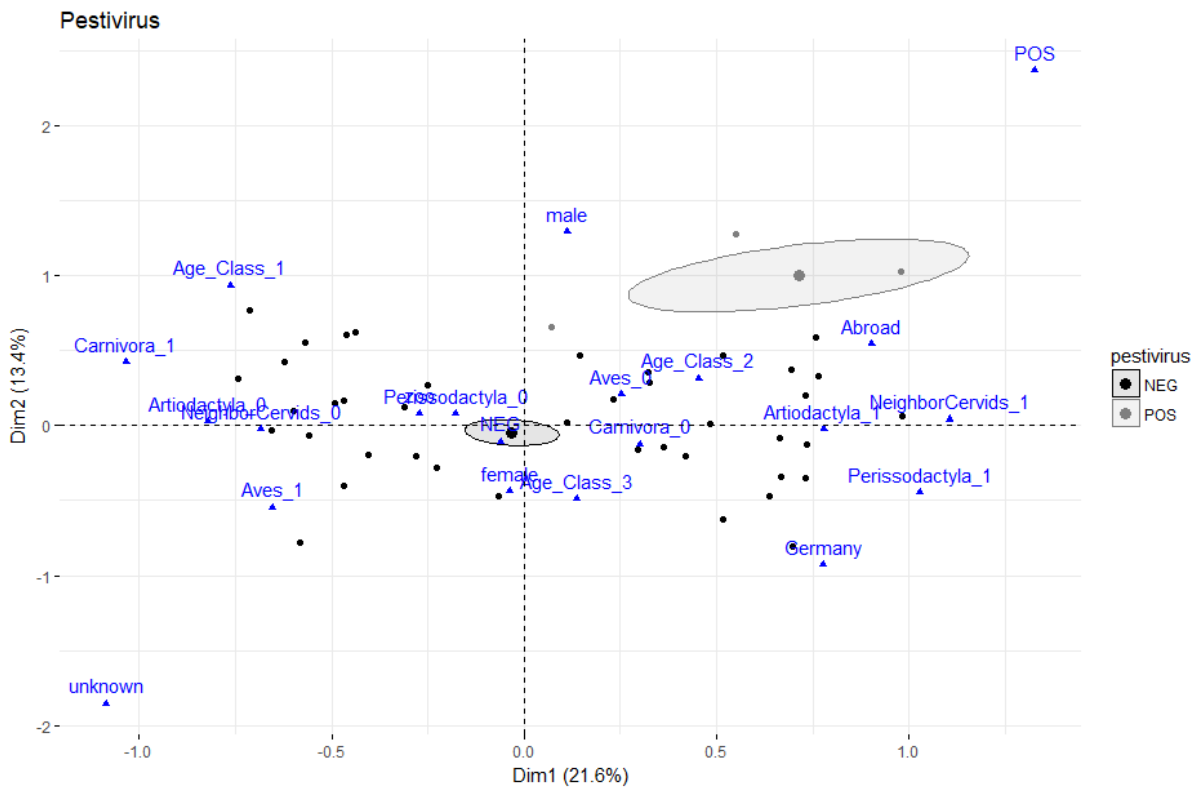

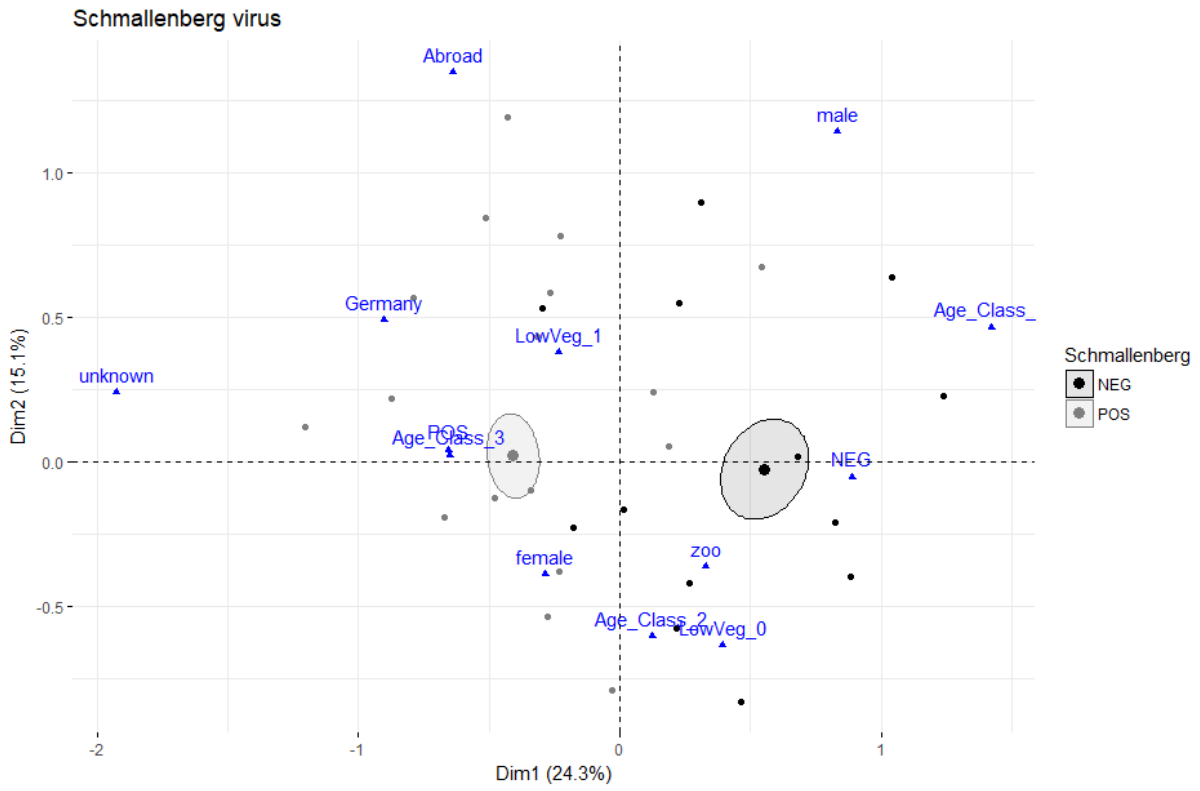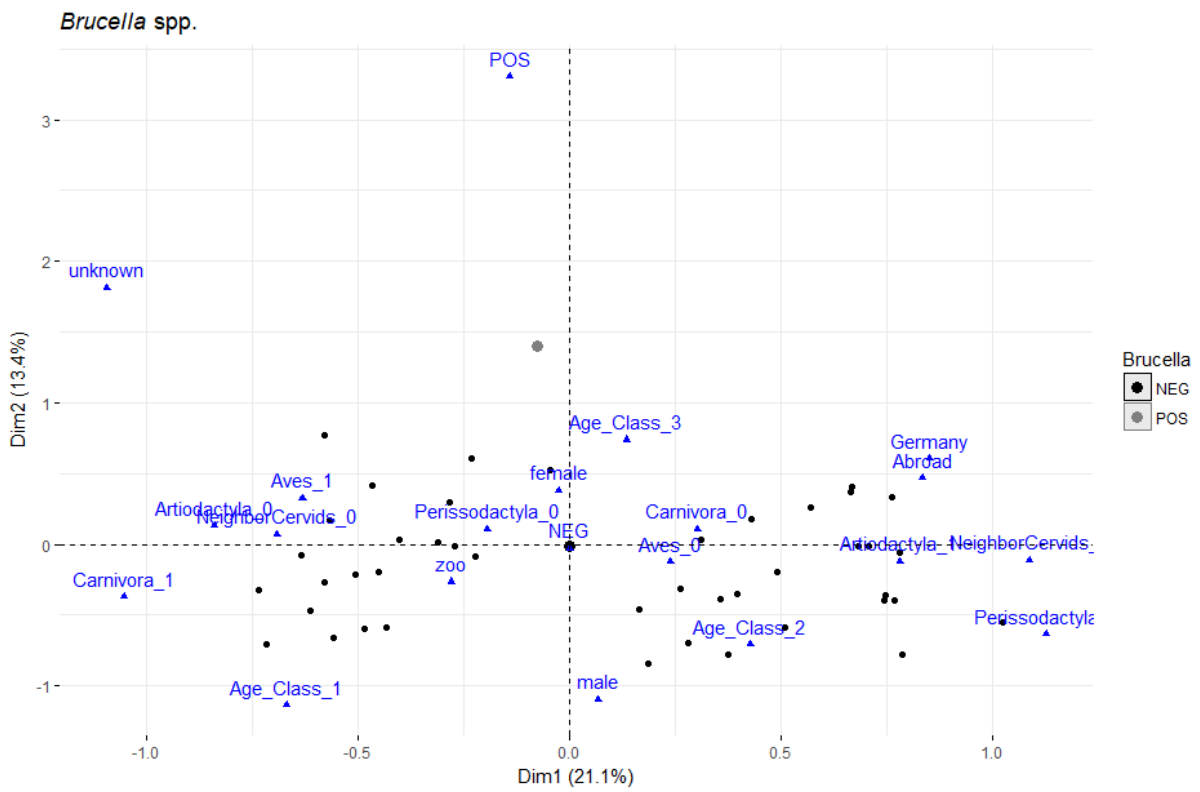

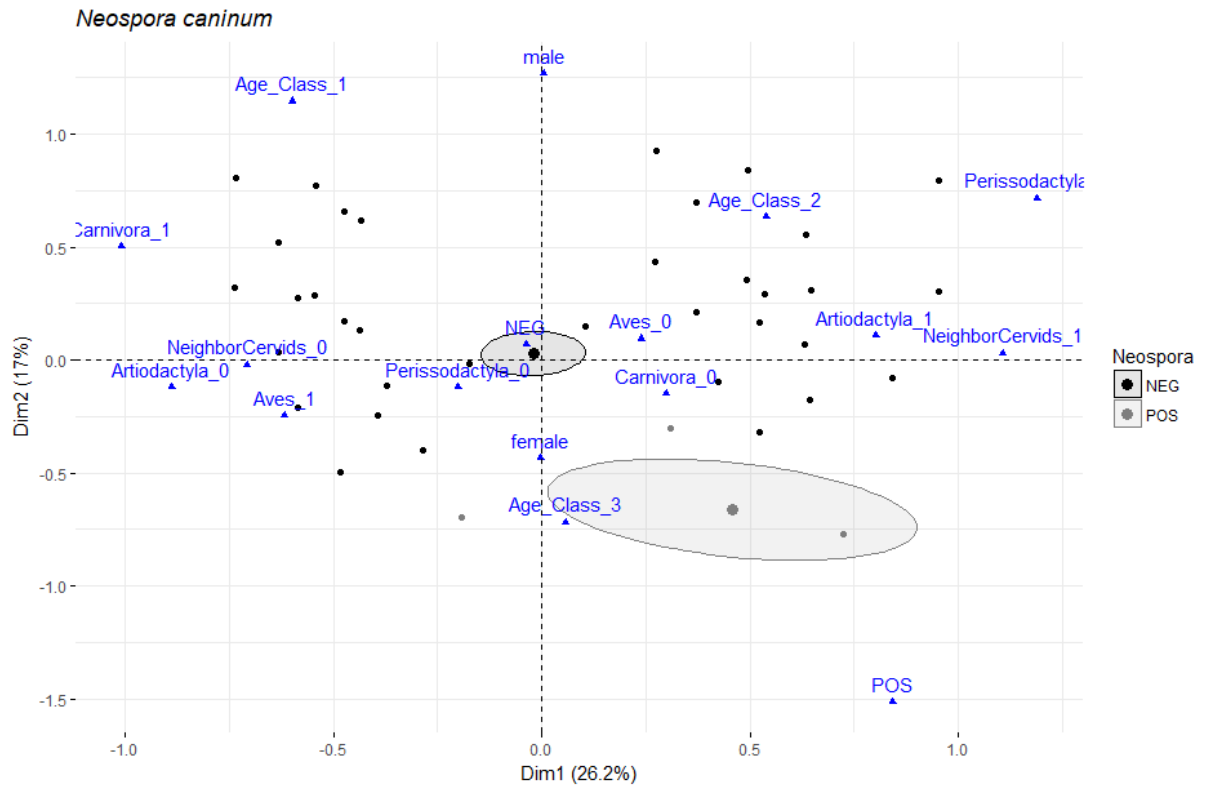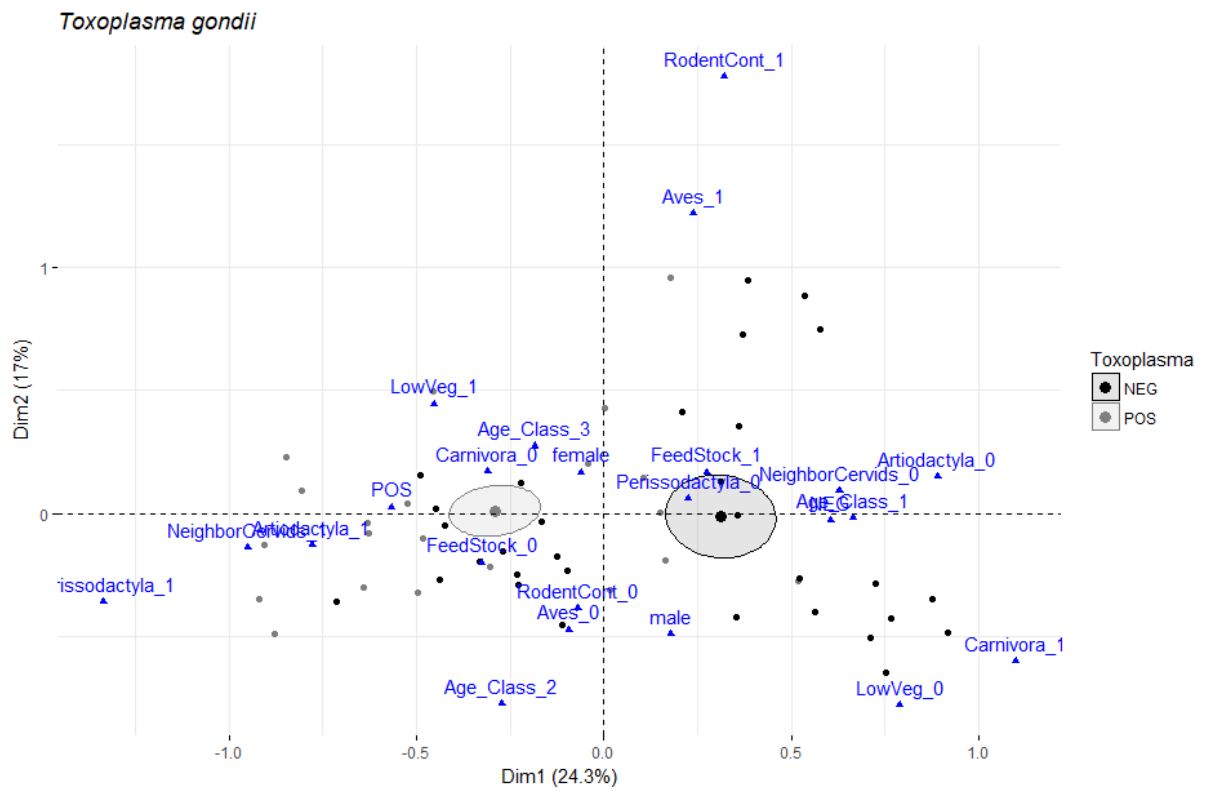

*Anaplasma phagocytophilum*

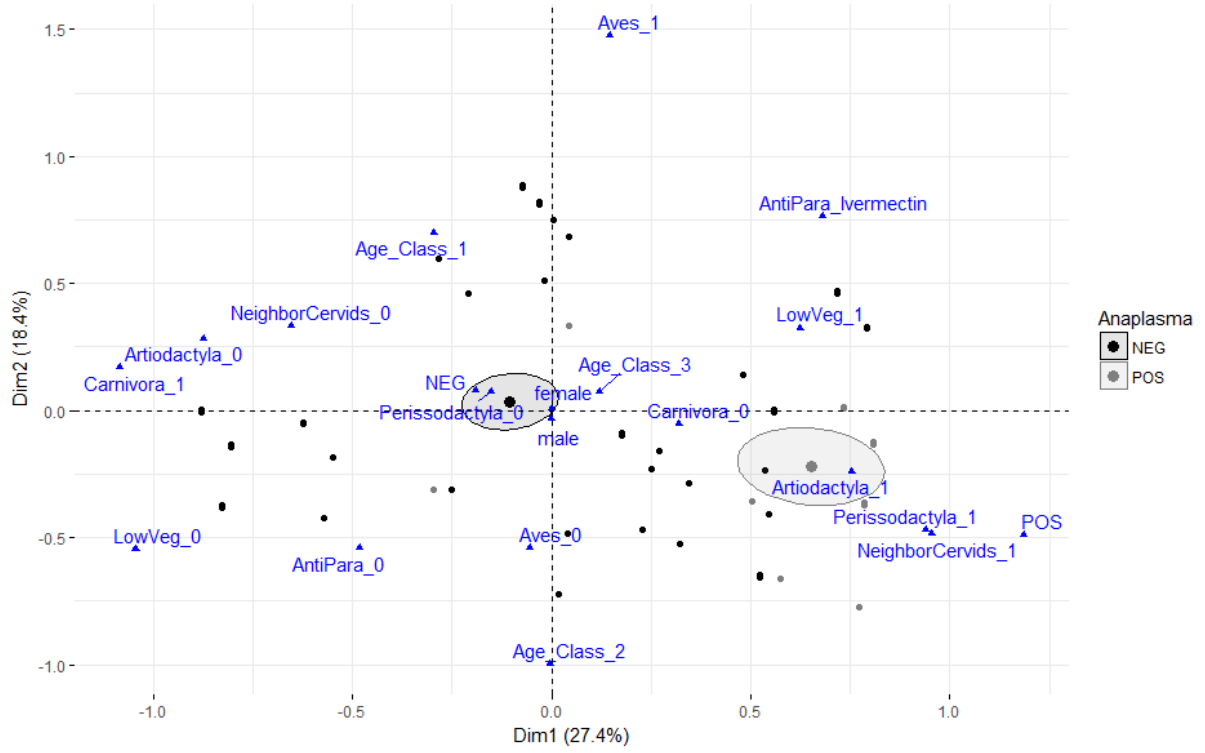

Supplement: Data_Sheet_1.pdf [file Data_Sheet_1.pdf]
